# Supplementary material for: A facile strategy for the synthesis of hierarchical CuO nanourchins and their application as non-enzymatic glucose sensors
Source: Royal Society of Chemistry journal article supplement (doi:10.1039/c3ra41098f), 2013-05-24
Supplement: c3ra41098f.pdf [file c3ra41098f.pdf]

Electronic Supplementary Information

## A facile strategy for the synthesis of hierarchical CuO nanourchins and their application as non-enzymatic glucose sensors†

Shaodong Sun, Xiaozhe Zhang, Yuexia Sun, Jie Zhang, Shengchun Yang, Xiaoping Song and Zhimao Yang\*

School of Science, State Key Laboratory for Mechanical Behavior of Materials, MOE Key Laboratory for Non-Equilibrium Synthesis and Modulation of Condensed Matter, Xi'an Jiaotong University, Xi'an 710049, ShaanXi, People's Republic of China.

*E-mail: zmyang@mail.xjtu.edu.cn (Z. M. Yang), or sdsun@mail.xjtu.edu.cn (S. D. Sun).*

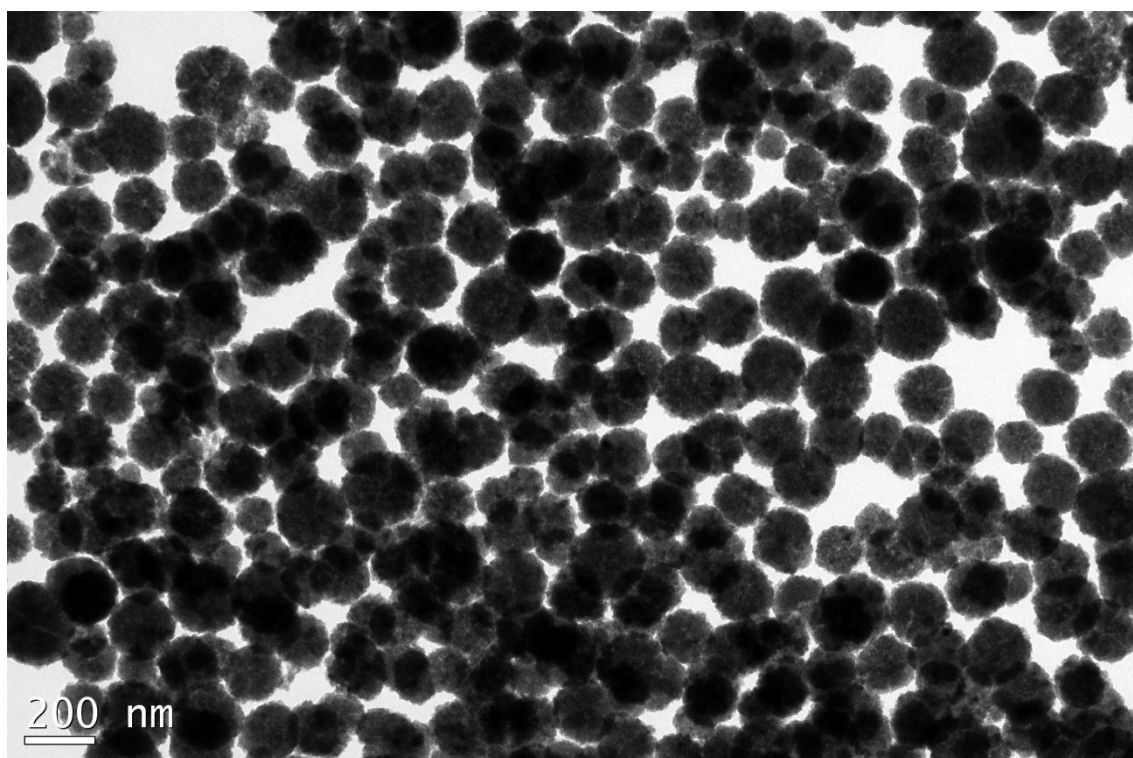

**Fig. S1** Low-magnification TEM image of the reported hierarchical Cu<sub>2</sub>O nanocrystals.

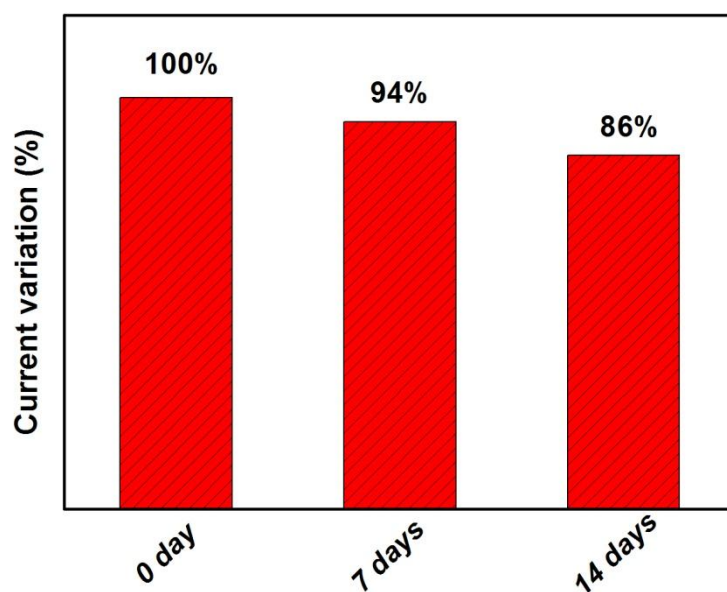

**Fig. S2** The stability of the as-prepared hierarchical-CuO/NFs/GCE electrode.

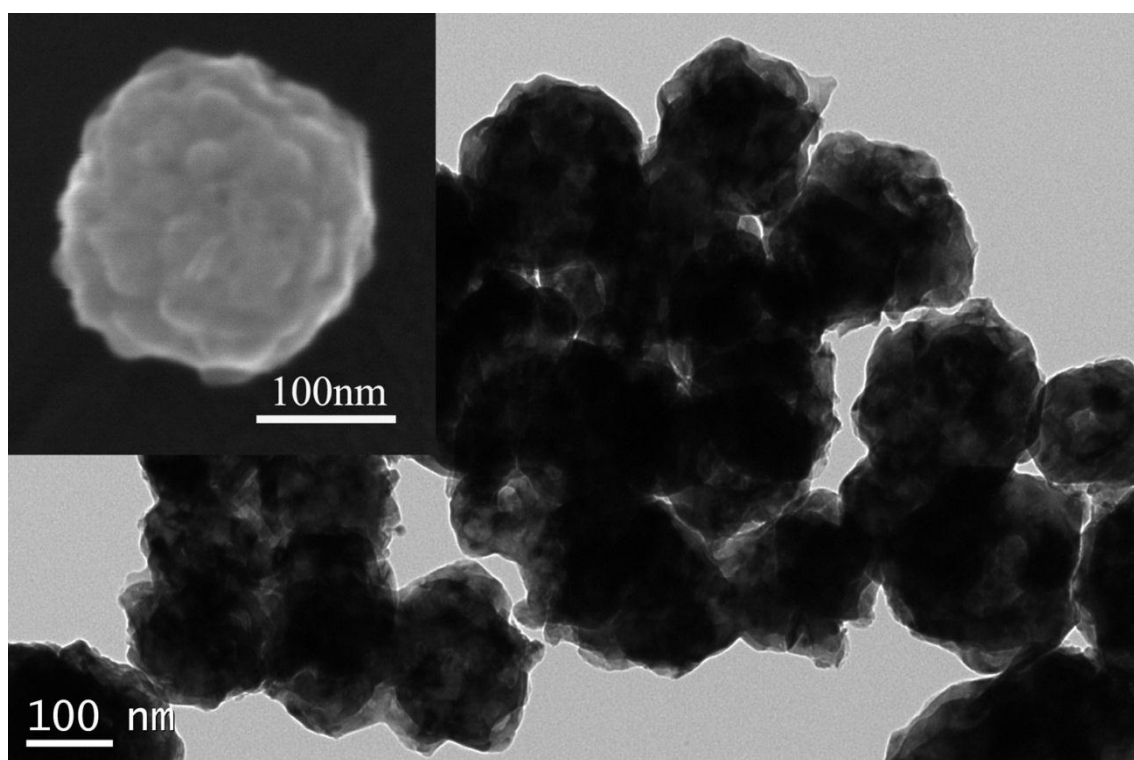

**Fig. S3** TEM image of the spherical CuO structures were synthesized by oxidation of the as-reported  $\text{Cu}_2\text{O}$  nanostructures at higher temperature (180 °C) for 7 days, the inset is a typical FESEM image of an individual product.
